# Supplementary material
Source: MDPI journal article supplement (https://www.mdpi.com/2076-3298/7/12/105)
Supplement: s1 [file s1]

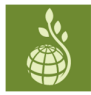

Supplementary Materials

## Hydrogeological and Hydrochemical Regime Evaluation in Flamouria Basin in Edessa (Northern Greece)

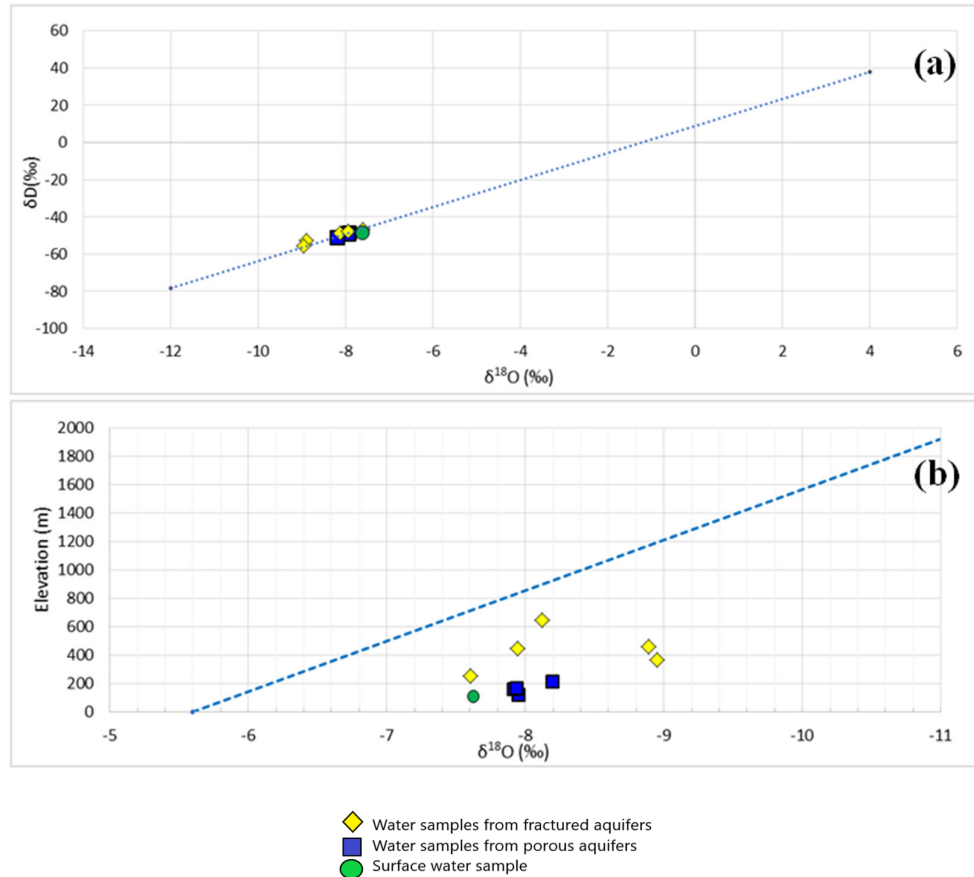

**Figure S1.** (a) Projection of the isotope concentrations in relation with the Hellas MWL for the July 2017 period. (b) Correlation between  $\delta^{18}\text{O}$  (‰) and the recharge altitude for the July 2017 period (change line between the isotope composition and the altitude according to the GNIP network).

**Table S1.** Groundwater level measurements campaign.

| Borehole | Aquifer type | Altitude (m) | Groundwater Level (GL) Measurements (m) |                |          |         |
|----------|--------------|--------------|-----------------------------------------|----------------|----------|---------|
|          |              |              | May 2017                                | September 2017 | May 2018 | ΔGL (m) |
| WLM1     | Porous       | 164          | 0.00                                    | 2.20           | 0.00     | 2.20    |
| WLM4     | Porous       | 188          | 8.25                                    | 12.50          | 7.70     | 9.50    |
| WLM4     | Porous       | 211          | 28.31                                   | 34.30          | -        | 31.00   |
| WLM6     | Porous       | 197          | 13.36                                   | 15.13          | -        | 14.24   |
| WLM7     | Porous       | 177          | 10.51                                   | 14.20          | 10.20    | 11.63   |
| WLM7     | Porous       | 187          | 15.25                                   | 10.30          | 14.86    | 13.47   |
| WLM9     | Porous       | 170          | 5.46                                    | 8.36           | 4.93     | 6.25    |
| WLM14    | Porous       | 221          | 38.63                                   | 44.35          | 36.7     | 40.00   |
| WLM15    | Porous       | 211          | 26.61                                   | 30.20          | -        | 28.40   |
| WLM16    | Porous       | 196          | 24.35                                   | 29.90          | -        | 27.12   |
| WLM18    | Porous       | 120          | -                                       | 8.820          | 8.90     | 8.86    |
| WLM20    | Karstic      | 184          | 91.36                                   | 94.10          | 85.20    | 90.22   |
| WLM22    | Porous       | 192          | 49.28                                   | 49.62          | 47.80    | 48.9    |
| WLM28    | Fractured    | 347          | 22.43                                   | 40.77          | 31.10    | 31.43   |
| WLM30    | Porous       | 245          | 27.13                                   | 31.00          | -        | 29.06   |
| WLM32    | Porous       | 238          | 5.93                                    | -              | -        | 5.93    |
| WLM35    | Fractured    | 500          | 11.26                                   | 17.01          | 6.65     | 11.64   |
| WLM36    | Fractured    | 591          | 18.23                                   | 17.8           | 14.00    | 16.67   |

**Table S2.** List of infiltration coefficients from Civita and De Maio [30] and Kazakis and Voudouris [26].

| Hydrogeological Complexes | Infiltration Coefficient |
|---------------------------|--------------------------|
| Coarse alluvial deposits  | 0.7–0.9                  |
| Limestone                 | 0.8–1.0                  |
| Dolostone                 | 0.6–0.7                  |
| Sand deposits             | 0.8–0.9                  |
| Clay, silt, peat          | 0.1–0.2                  |
| Fissured volcanites       | 0.8–0.9                  |
| Flysch deposits           | 0.2–0.3                  |
| Pyroclastic rocks         | 0.4–0.6                  |
| Metamorphic rocks         | 0.1–0.2                  |

**Table S3.** Parameters classes for the PNA methodology from Busico et al. [36].

| Unsaturated Zone Protection <sup>a</sup>                       |                                        | Topography <sup>b</sup> (% slope)            |         | Depth to Water <sup>a</sup> (m)                  |       |
|----------------------------------------------------------------|----------------------------------------|----------------------------------------------|---------|--------------------------------------------------|-------|
| Rating                                                         | Type                                   | Rating                                       | Range   | Rating                                           | Range |
| 10                                                             | Karst limestone                        | 10                                           | < 5     | 10                                               | -     |
| 9                                                              | Limestone calcarenites                 | 9                                            | 5–10    | 9                                                | 0–5   |
| 8                                                              | Recent lavas                           | 8                                            | 10–15   | 8                                                | 5–10  |
| 7                                                              | Alluvial and fluvio sands              | 7                                            | 15–19   | 7                                                | -     |
| -                                                              |                                        | 6                                            | 19–24   | 6                                                | 10–20 |
| 5                                                              | Siltstone, tuff, igneous               | 5                                            | 24–29   | 5                                                | -     |
| 4                                                              | Metamorphic and old volcanic formation | 4                                            | 29–34   | 4                                                | 20–50 |
| 3                                                              | Alluvial silt, shales                  | 3                                            | 34–39   | 3                                                | -     |
| -                                                              |                                        | 2                                            | 39–44   | 2                                                | > 50  |
| 1                                                              | residual soil                          | 1                                            | > 44    | 1                                                | -     |
| Land Use <sup>d</sup> (Amount of Fertilizer for Kind of Crops) |                                        | Recharge + Irrigation <sup>c</sup> (mm/year) |         | Wells Density <sup>d</sup> (Nw/Km <sup>2</sup> ) |       |
| Rating                                                         | Range                                  | Rating                                       | Type    | Rating                                           | Range |
| 1                                                              | Pasture, forest, bare land             | 1                                            | 0–25    | 1                                                | 0     |
| 2                                                              | Olive grooves                          | 2                                            | 25–50   | 2                                                | 1–2   |
| 3                                                              | Vegetable                              | 3                                            | 50–70   | 3                                                | 3–4   |
| 4                                                              | Orchads and citrus                     | 4                                            | 70–100  | 4                                                | 5–6   |
| 5                                                              | -                                      | 5                                            | 100–120 | 5                                                | 6–7   |
| 6                                                              | Urban areas                            | 6                                            | 120–150 | 6                                                | 8–9   |
| 7                                                              | -                                      | 7                                            | 150–180 | 7                                                | 10–11 |
| 8                                                              | -                                      | 8                                            | 180–220 | 8                                                | 12–13 |
| 9                                                              | -                                      | 9                                            | 220–300 | 9                                                | 14–15 |
| 10                                                             | Cereals                                | 10                                           | -       | 10                                               | 16–17 |
| Soil Nitrogen Content <sup>e</sup> (%)                         |                                        |                                              |         |                                                  |       |
| Rating                                                         | Range                                  |                                              |         |                                                  |       |
| 1.04                                                           | > 0.5                                  |                                              |         |                                                  |       |
| 1.02                                                           | 0.22–0.5                               |                                              |         |                                                  |       |
| 1.00                                                           | 0.15–0.22                              |                                              |         |                                                  |       |
| 0.98                                                           | 0.1–0.15                               |                                              |         |                                                  |       |
| 0.96                                                           | < 0,1                                  |                                              |         |                                                  |       |

**Table S4.** Isotopic ratio statistic for the sampled groundwaters.

| Ion Ratios                              | Mean Value | Max Value | Min Value | St. Dev. |
|-----------------------------------------|------------|-----------|-----------|----------|
| Na/K                                    | 13.33      | 74.43     | 2.32      | 20.51    |
| Mg/Ca                                   | 0.61       | 0.92      | 0.13      | 0.24     |
| Na/Cl                                   | 2.50       | 4.47      | 0.85      | 1.12     |
| (Ca+Mg)/(Na+K)                          | 27.14      | 41.83     | 15.12     | 9.29     |
| (Ca+Mg)/HCO <sub>3</sub>                | 1.09       | 1.38      | 0.99      | 0.11     |
| SO <sub>4</sub> /Cl                     | 5.36       | 9.59      | 1.16      | 2.72     |
| Cl/HCO <sub>3</sub>                     | 0.02       | 0.04      | 0.01      | 0.01     |
| Mg/(Mg+Ca)                              | 0.36       | 0.48      | 0.12      | 0.11     |
| Cl/SO <sub>4</sub>                      | 0.28       | 0.86      | 0.10      | 0.22     |
| Cl/(CO <sub>3</sub> +HCO <sub>3</sub> ) | 0.02       | 0.04      | 0.01      | 0.01     |

**Supplementary Information 1: ET Formula**

$$I = \sum_{i=1}^{12} \left(\frac{T}{5}\right)^{1.514}$$

$$a = 0.49239 + 1792 \times 10^{-5} \times I - 771 \times I^2 + 675 \times 10^{-9} \times I^3$$

**Supplementary Information 2: Regression line in Figure S1b**

The regression equation in Figure S1b can be obtained by a regression analysis of the annual average values of  $\delta^{18}\text{O}$  in groundwater and elevations:  $\delta^{18}\text{O} = -356.12 h - 1994.3$  ( $R^2 = 1$ ,  $n = 10$ ), where  $h$  is the elevation, and the unit is m. It was found that the elevation gradients of the stable isotope values ( $\delta^{18}\text{O}$ ) of groundwater in the study area were  $-0.36\text{‰}/100\text{ m}$ . This value is in the range of  $-0.15\text{‰}$  to  $-0.50\text{‰}$  [1] and  $-0.10\text{‰}$  to  $-0.60\text{‰}$  [2] applied to most regions around the world. According to Figure S1b, most points are projected below the line which indicate how the recharge altitude is higher than that at which the sampling took place. The annual stable isotope values ( $\delta^{18}\text{O}$ ) of groundwater for the period of July 2017 have significant correlations with the elevation ( $n = 10$ ,  $R^2 > 0.63$ ).

1. Clark, I.D.; Fritz, P. *Environmental Isotopes in Hydrogeology*; CRC Press/Lewis Publishers: Florida, USA, 1997.
2. Mook, W.G. Isotope fractionation processes. In *Introduction to Isotope Hydrology*; CRC Press Taylor & Francis Group: Florida, USA, 2005.
